# Supplementary material for: Self-rated joint hypermobility: the five-part questionnaire evaluated in a Swedish non-clinical adult population
Source: Springer Nature journal article supplement (doi:10.1186/s12891-020-3067-1), 2020-03-17
Supplement: MOESM1 [file 17807798]

**Table S1. The translation process of the Swedish 5PQ.**

| Item | Original version of the 5PQ                                                                                   | Forward translation                                                                                             | Expert panel (Final version)                                                                                    | Back translation 1                                                                                                                  | Back translation 2                                                                                                 |
|------|---------------------------------------------------------------------------------------------------------------|-----------------------------------------------------------------------------------------------------------------|-----------------------------------------------------------------------------------------------------------------|-------------------------------------------------------------------------------------------------------------------------------------|--------------------------------------------------------------------------------------------------------------------|
| 1    | Can you now (or could you ever) place your hands flat on the floor without bending your knees?                | Kan du nu (eller har du någonsin kunnat) placera händerna platt på golvet utan att böja knäna?                  | Kan du nu (eller har du någonsin kunnat) placera händerna platt på golvet utan att böja knäna?                  | Can you now (or have you ever been able to) place your hands flat on the floor without bending your knees?                          | Are you able (have you ever been able) to place your palms flat on the floor without bending your knees?           |
| 2    | Can you now (or could you ever) bend your thumb to touch your forearm?                                        | Kan du nu (eller har du någonsin kunnat) böja tummen så att den nuddar din underarm?                            | Kan du nu (eller har du någonsin kunnat) böja tummen så att den nuddar din underarm?                            | Can you now (or have you ever been able to) bend your thumb so that it touches your forearm?                                        | Are you able to (have you ever been able to) bend your thumb so that it touches your forearm?                      |
| 3    | As a child did you amuse your friends by contorting your body into strange shapes OR could you do the splits? | Underhöll du dina vänner med att vrida din kropp i konstiga ställningar eller kunde du gå ner i split som barn? | Underhöll du dina vänner med att vrida din kropp i konstiga ställningar eller kunde du gå ner i split som barn? | Did you entertain your friends by twisting your body into strange positions or were you able to go down into the splits as a child? | Did you entertain your friends by twisting your body into strange positions or could you do the splits as a child? |
| 4    | As a child or teenager did your shoulder or kneecap dislocate on more than one occasion?                      | Har din knäskål eller axel gått ur led mer än en gång som barn eller tonåring?                                  | Har din knäskål eller axel gått ur led mer än en gång som barn eller tonåring?                                  | Have your kneecaps or shoulders become dislocated on more than one occasion as a child or teenager?                                 | Have your knee-caps or shoulders been dislocated more than once as a child or teenager?                            |
| 5    | Do you consider yourself double-jointed?                                                                      | Anser du dig själv vara extremt böjlig i lederna?                                                               | Anser du dig själv vara påtagligt överrörlig i lederna?                                                         | Do you consider yourself to be clearly hypermobile in your joints?                                                                  | Do you consider yourself to have joint hypermobility?                                                              |
