# Supplementary material for: Self-rated joint hypermobility: the five-part questionnaire evaluated in a Swedish non-clinical adult population
Source: Springer Nature journal article supplement (doi:10.1186/s12891-020-3067-1), 2020-03-17
Supplement: MOESM2 [file 17807798]

**Table S2. Evaluation of validity of the Swedish 5PQ. Tested against various cut-off scores on the reference test.**

| <b>5PQ score</b>                                                                     | <b>Sensitivity (%) (95% CI)</b> | <b>Specificity (%) (95% CI)</b> |
|--------------------------------------------------------------------------------------|---------------------------------|---------------------------------|
| <b>BS cut-off according to the current age-dependent recommendations<sup>a</sup></b> |                                 |                                 |
| ≥ 1/5                                                                                | 95.65 (78.05, 99.89)            | 34.10 (28.37, 40.20)            |
| ≥ 2/5 <sup>b</sup>                                                                   | 91.30 (71.96, 98.93)            | 74.71 (68.98, 79.87)            |
| ≥ 3/5                                                                                | 56.52 (34.49, 76.81)            | 91.57 (87.52, 94.64)            |
| <b>BS cut-off one point below the recommendations<sup>c</sup></b>                    |                                 |                                 |
| ≥ 1/5                                                                                | 86.00 (73.26, 94.18)            | 35.47 (29.35, 41.97)            |
| ≥ 2/5 <sup>b</sup>                                                                   | 72.00 (57.51, 83.77)            | 78.21 (72.36, 83.32)            |
| ≥ 3/5                                                                                | 42.00 (28.19, 56.79)            | 94.02 (90.17, 96.69)            |
| <b>BS cut-off one point above the recommendations<sup>d</sup></b>                    |                                 |                                 |
| ≥ 1/5                                                                                | 100.00 (75.51, 100.00)          | 32.97 (27.42, 38.89)            |
| ≥ 2/5 <sup>b</sup>                                                                   | 100.00 (71.51, 100.00)          | 72.16 (66.44, 77.39)            |
| ≥ 3/5                                                                                | 36.36 (10.93, 69.21)            | 10.26 (6.92, 14.48)             |

5PQ: The Five-part questionnaire on hypermobility

BS: Beighton Score

PPV: Positive predictive value

NPV: Negative predictive value

<sup>a</sup> A present Beighton Score with an age-dependent cut-off of ≥ 5/9 for individuals 18-50 years and ≥ 4/9 for individuals >50 years

<sup>b</sup> The recommended cut-off score for generalised joint hypermobility on the 5PQ[4]

<sup>c</sup> A present Beighton Score cut-off of ≥ 4/9 for individuals 18-50 years and ≥ 3/9 for individuals >50 years

<sup>d</sup> A present Beighton Score cut-off of ≥ 6/9 for individuals 18-50 years and ≥ 5/9 for individuals >50 years
