# Supplementary material for: Self-rated joint hypermobility: the five-part questionnaire evaluated in a Swedish non-clinical adult population
Source: Springer Nature journal article supplement (doi:10.1186/s12891-020-3067-1), 2020-03-17
Supplement: MOESM3 [file 17807798]

## The Swedish 5PQ

Namn: Ålder: Kön:

Datum: Ansvarig:

Besvara frågorna utifrån vad som känns sant för dig. Sätt kryss i endast en ruta per fråga!

|    |                                                                                                                 | NEJ                      | JA                       |
|----|-----------------------------------------------------------------------------------------------------------------|--------------------------|--------------------------|
| 1. | Kan du nu (eller har du någonsin kunnat) placera händerna platt på golvet utan att böja knäna?                  | <input type="checkbox"/> | <input type="checkbox"/> |
| 2. | Kan du nu (eller har du någonsin kunnat) böja tummen så att den nuddar din underarm?                            | <input type="checkbox"/> | <input type="checkbox"/> |
| 3. | Underhåll du dina vänner med att vrida din kropp i konstiga ställningar eller kunde du gå ner i split som barn? | <input type="checkbox"/> | <input type="checkbox"/> |
| 4. | Har din knäskål eller axel gått ur led mer än en gång som barn eller tonåring?                                  | <input type="checkbox"/> | <input type="checkbox"/> |
| 5. | Anser du dig själv vara påtagligt överrörlig i lederna?                                                         | <input type="checkbox"/> | <input type="checkbox"/> |

The Swedish 5PQ är en svensk översättning av the Hakim-Grahame five-part questionnaire on hypermobility.

Referens: Glans M, Humble M, Elwin M, Bejerot S. Self-rated joint hypermobility: The five-part questionnaire evaluated in a Swedish non-clinical adult population. BMC Musculoskeletal Disord. 2020. <https://doi.org/10.1186/s12891-020-3067-1>.

## The Swedish 5PQ

Rättning:

- Alla items poängsätts med ett poäng för “ja” och noll poäng för “nej”.
- Den sammanlagda poängen kan variera mellan 0 och 5.
- $\geq 2$  poäng tyder på generalised joint hypermobility (GJH).

The Swedish 5PQ validerades på en icke-klinisk svensk vuxen population:

- Reference standard test var Beighton Score med cut-off  $\geq 5/9$  för individer 18-50 års ålder och  $\geq 4/9$  för individer  $>50$  års ålder.
- The Swedish 5PQ uppnådde en sensitivitet på 91%, en specificitet på 75% och en area under the curve på 0.87.

The Swedish 5PQ är en svensk översättning av the Hakim-Grahame five-part questionnaire on hypermobility.

Referens: Glans M, Humble M, Elwin M, Bejerot S. Self-rated joint hypermobility: The five-part questionnaire evaluated in a Swedish non-clinical adult population. BMC Musculoskeletal Disord. 2020. <https://doi.org/10.1186/s12891-020-3067-1>.
